# Supplementary figures and images for: The comparative study on the catalytic activity of Cu–M/Ce0.8Zr0.2O2 (M = W, Nb, Cr and Mo) catalysts with dual-function for the simultaneous removal of NO and CO under oxygen-rich conditions
Source: Royal Society of Chemistry journal article supplement (doi:10.1039/d1cy00517k), 2021-01-01

Supporting information:

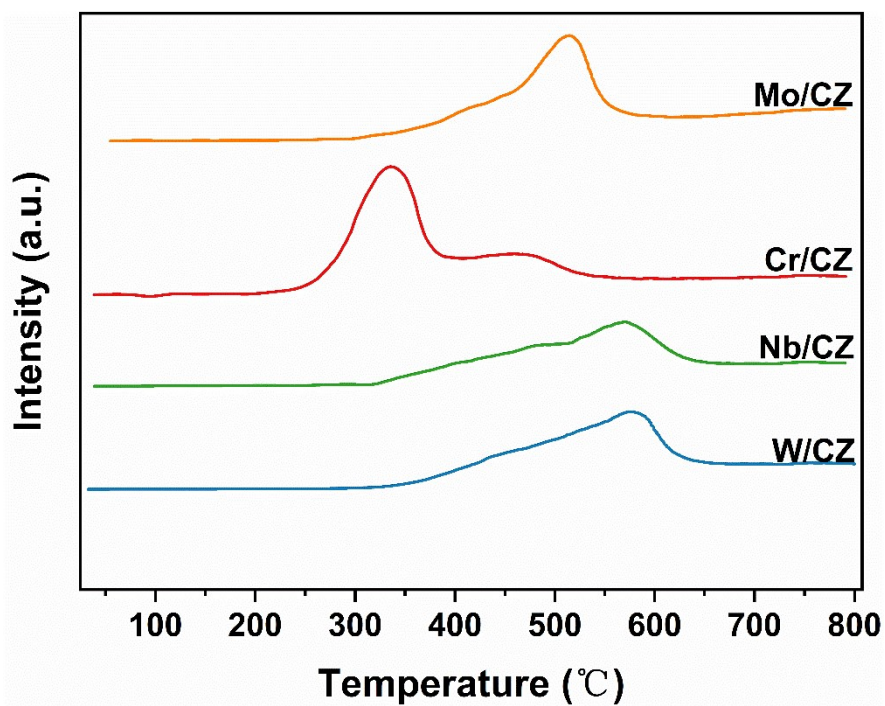

Fig. S1 The H<sub>2</sub>-TPR profiles of Mo/CZ, Cr/CZ, Nb/CZ, and W/CZ catalysts.

Supplement: d1cy00517k1.pdf [file d1cy00517k1.pdf]
